# Supplementary material for: The Origin of Large-Bodied Shrimp that Dominate Modern Global Aquaculture
Source: PubMed Central journal article supplement (PMC4945062; doi:10.1371/journal.pone.0158840), 2016-07-14
Supplement: pone.0158840.s001.pdf [file pone.0158840.s001.pdf]

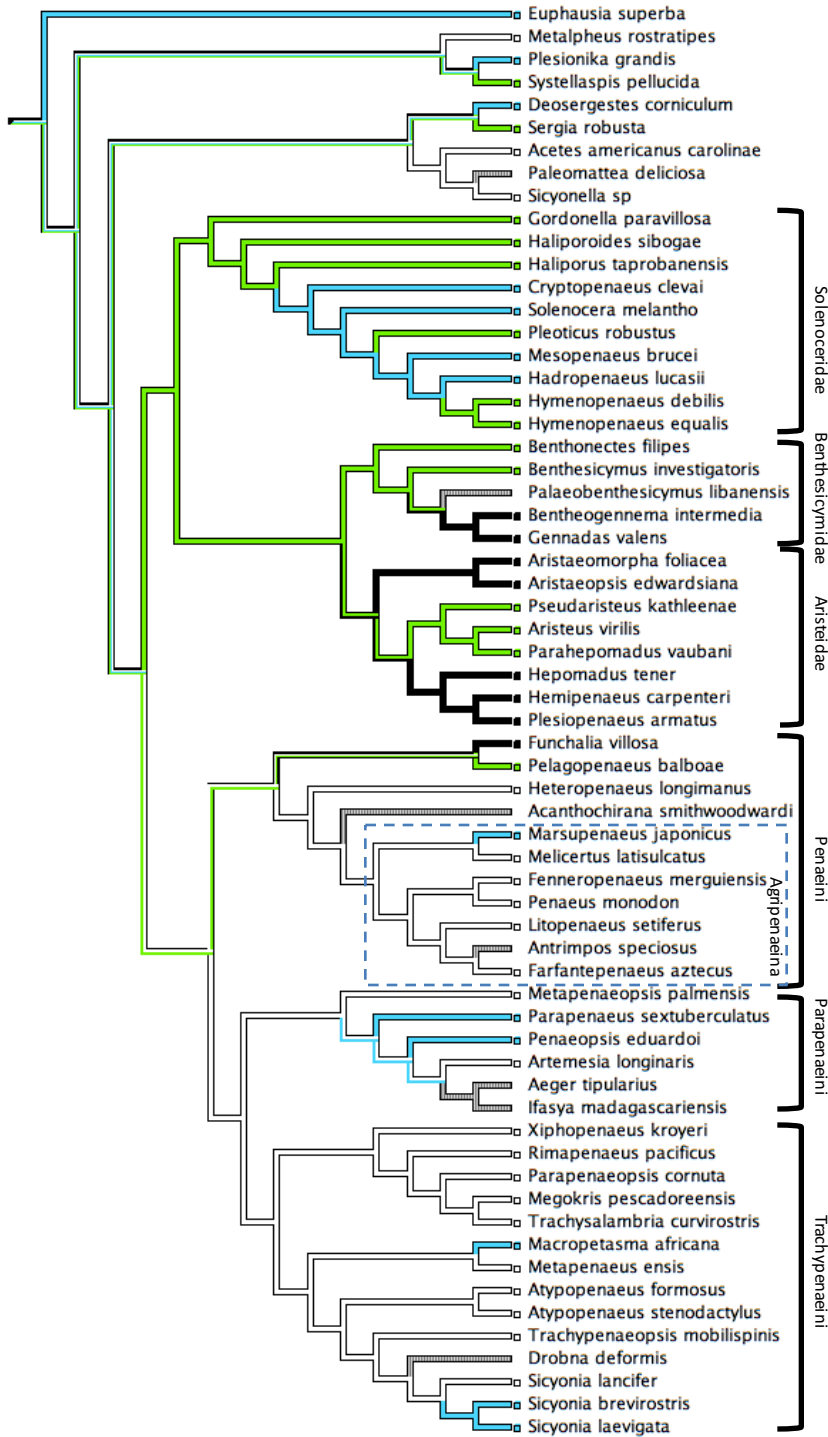

**Phorcytida**

**Penaeidae**

- Data missing or inapplicable
- Sub-littoral, restricted to less than 200 m
- Mesopelagic, reaching deeper than 200 m but less than 1,000 m
- Bathyal, reaching deeper than 1,000 m but less than 4,000 m
- Abyssal, exceeding 4,000 m

- Euphausia superba
- Metalpheus rostratipes
- Plesionika grandis
- Systellaspis pellucida
- Deosergestes corniculum
- Sergia robusta
- Acetes americanus carolinae
- Paleomattea deliciosa
- Sicyonella sp
- Gordonella paravillosa
- Haliporoides sibogae
- Haliporus taprobanensis
- Cryptopenaeus clevai
- Solenocera melantho
- Pleoticus robustus
- Mesopenaeus brucei
- Hadropenaeus lucasii
- Hymenopenaeus debilis
- Hymenopenaeus equalis
- Benthonectes filipes
- Benthescymnus investigatoris
- Palaeobenthescymnus libanensis
- Benthoeugnema intermedia
- Gennadas valens
- Aristaeomorpha foliacea
- Aristaeopsis edwardsiana
- Pseudaristeus kathleenae
- Aristeus virilis
- Parahepomadus vaubani
- Hepomadus tener
- Hemipenaeus carpenteri
- Plesiopenaeus armatus
- Funchalia villosa
- Pelagopenaeus balboae
- Heteropenaeus longimanus
- Acanthochirana smithwoodwardi
- Marsupenaeus japonicus
- Melicertus latisulcatus
- Fenneropenaeus merguensis
- Penaeus monodon
- Litopenaeus setiferus
- Antrimpos speciosus
- Farfantepenaeus aztecus
- Metapenaeopsis palmensis
- Parapenaeus sextuberculatus
- Penaeopsis eduardoi
- Artemesia longinaris
- Aeger tipularius
- Ifasya madagascariensis
- Xiphopenaeus kroyeri
- Rimapenaeus pacificus
- Parapenaeopsis cornuta
- Megokris pescadoreensis
- Trachysalambria curvirostris
- Macropetasma africana
- Metapenaeus ensis
- Atyppopenaeus formosus
- Atyppopenaeus stenodactylus
- Trachypenaeopsis mobilispinis
- Drobna deformis
- Sicyonia lancifer
- Sicyonia brevirostris
- Sicyonia laevigata
