# Supplementary material for: The Origin of Large-Bodied Shrimp that Dominate Modern Global Aquaculture
Source: PubMed Central journal article supplement (PMC4945062; doi:10.1371/journal.pone.0158840), 2016-07-14
Supplement: pone.0158840.s002.pdf [file pone.0158840.s002.pdf]

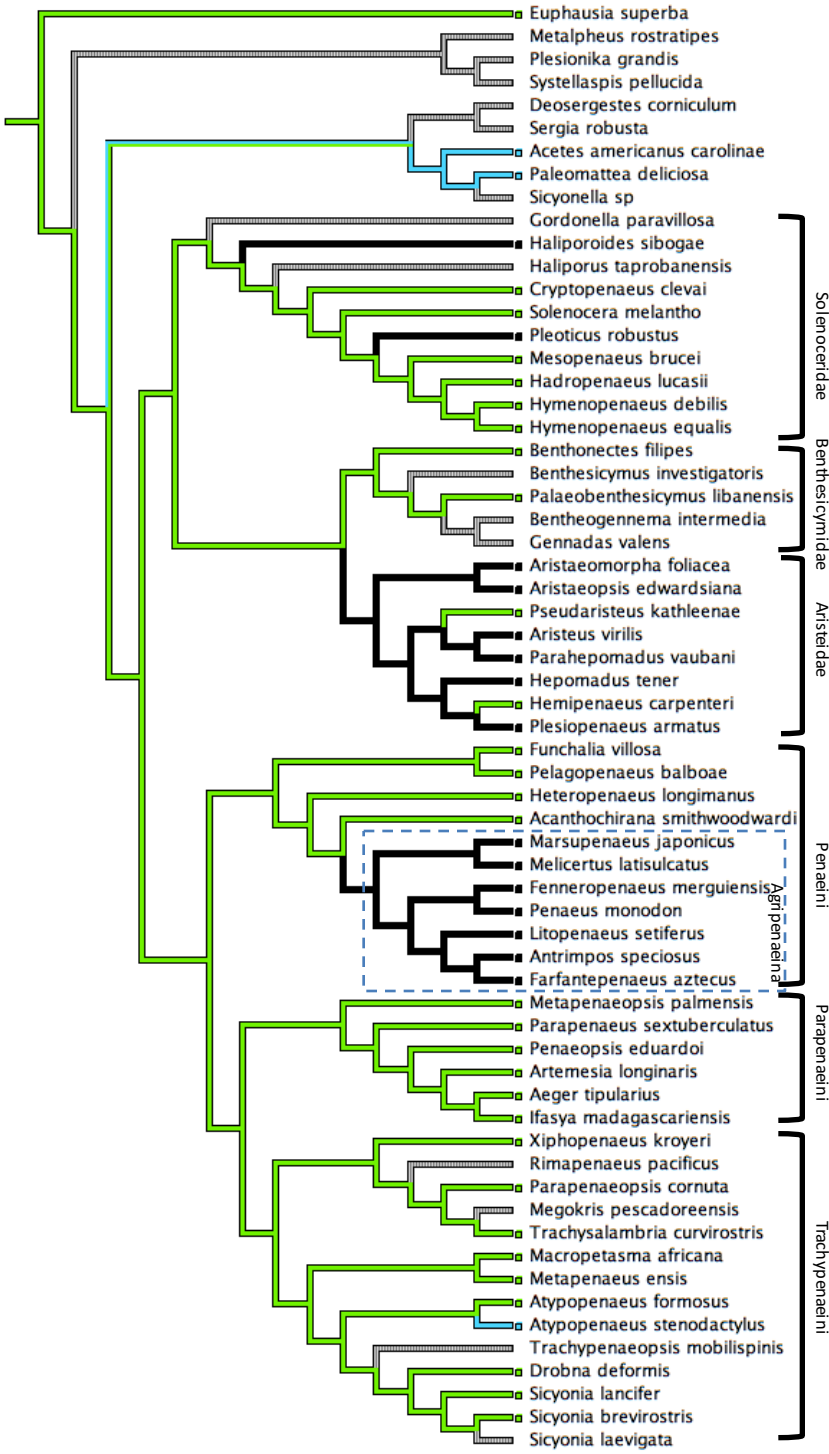

**Phorcytida**

**Penaeidae**

- Data missing or inapplicable
- Small, up to 5 cm long
- Medium, longer than 5 cm but shorter than 20 cm
- Large, 20 cm or longer

- Euphausia superba
- Metalpheus rostratipes
- Plesionika grandis
- Systellaspis pellucida
- Deosergestes corniculum
- Sergia robusta
- Acetes americanus carolinae
- Paleomattea deliciosa
- Sicyonella sp.
- Gordonella paravillosa
- Haliporoides sibogae
- Haliporus taprobanensis
- Cryptopenaeus clevai
- Solenocera melantho
- Pleoticus robustus
- Mesopenaeus brucei
- Hadropenaeus lucasii
- Hymenopenaeus debilis
- Hymenopenaeus equalis
- Benthonectes filipes
- Benthescymnus investigatoris
- Palaeobenthescymnus libanensis
- Bentheogennema intermedia
- Gennadas valens
- Aristaeomorpha foliacea
- Aristaeopsis edwardsiana
- Pseudaristeus kathleenae
- Aristeus virilis
- Parahepomadus vaubani
- Hepomadus tener
- Hemipenaeus carpenteri
- Plesiopenaeus armatus
- Funchalia villosa
- Pelagopenaeus balboae
- Heteropenaeus longimanus
- Acanthochirana smithwoodwardi
- Marsupenaeus japonicus
- Melicertus latisulcatus
- Fenneropenaeus merguensis
- Penaeus monodon
- Litopenaeus setiferus
- Antrimpos speciosus
- Farfantepenaeus aztecus
- Metapenaeopsis palmensis
- Parapenaeus sextuberculatus
- Parapenaeopsis eduardoi
- Artemesia longinaris
- Aeger tipularius
- Ifasya madagascariensis
- Xiphopenaeus kroyeri
- Rimopenaeus pacificus
- Parapenaeopsis cornuta
- Megokris pescadoreensis
- Trachysalambria curvirostris
- Macropetasma africana
- Metapenaeus ensis
- Atypopenaeus formosus
- Atypopenaeus stenodactylus
- Trachypenaeopsis mobilispinis
- Drobna deformis
- Sicyonia lancifer
- Sicyonia brevisrostris
- Sicyonia laevigata

Solenoceridae

Benthescymnidae

Aristeidae

Penaeini

Agripenaeina

Parapenaeini

Trachypenaeini
