# Supplementary material for: The Origin of Large-Bodied Shrimp that Dominate Modern Global Aquaculture
Source: PubMed Central journal article supplement (PMC4945062; doi:10.1371/journal.pone.0158840), 2016-07-14
Supplement: pone.0158840.s003.pdf [file pone.0158840.s003.pdf]

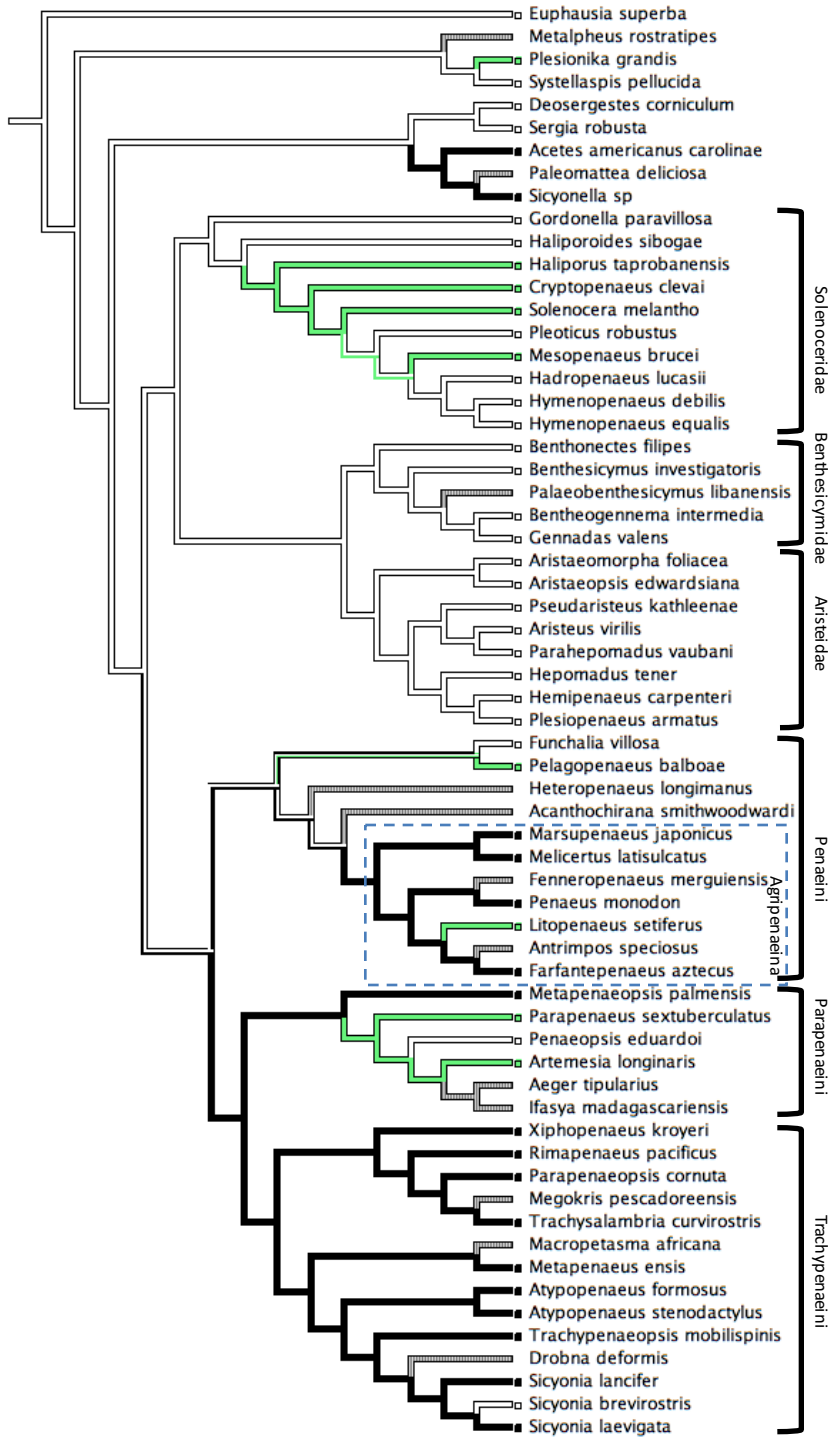

- Data missing or inapplicable
- Observed in very cold water, <7 C
- Observed in cold to temperate water, 7-15 C
- Observed only in warm water, >15 C

**Phorcytida**

**Penaeidae**
