# Supplementary material for: The Origin of Large-Bodied Shrimp that Dominate Modern Global Aquaculture
Source: PubMed Central journal article supplement (PMC4945062; doi:10.1371/journal.pone.0158840), 2016-07-14

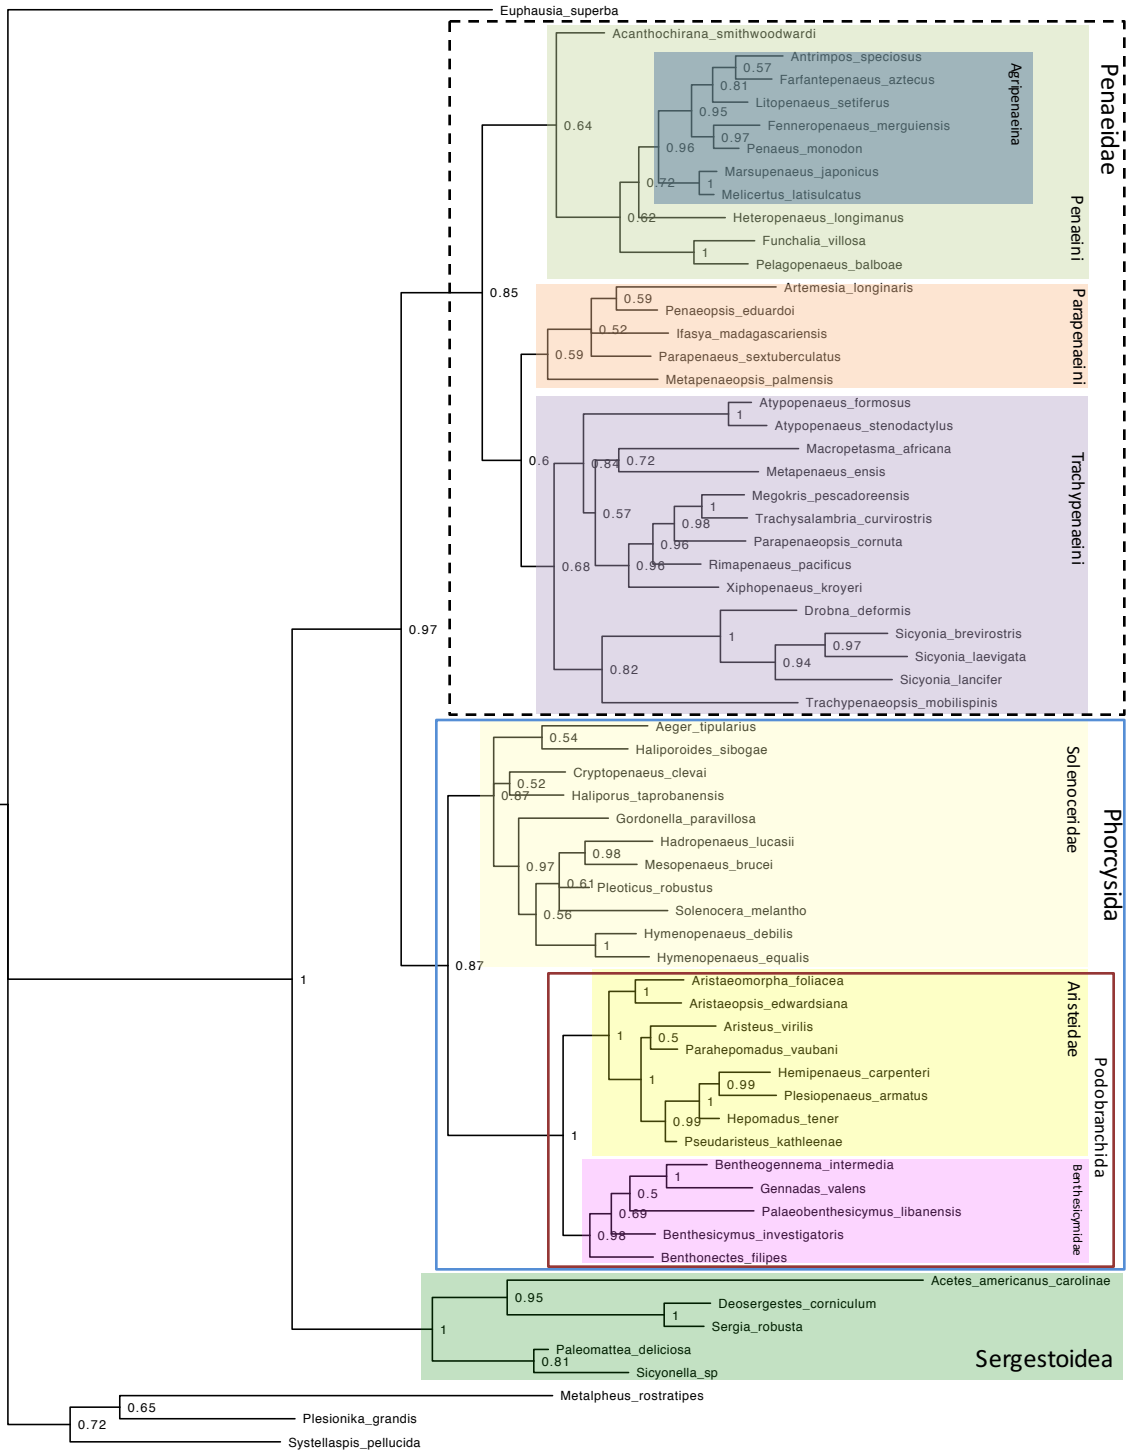

Supplement: pone.0158840.s004.pdf [file pone.0158840.s004.pdf]
