# Supplementary material for: The Origin of Large-Bodied Shrimp that Dominate Modern Global Aquaculture
Source: PubMed Central journal article supplement (PMC4945062; doi:10.1371/journal.pone.0158840), 2016-07-14
Supplement: pone.0158840.s005.pdf [file pone.0158840.s005.pdf]

**S1 Table. Major clades from combined data parsimony analysis.**

| Clade            | Definition                                                                                                            |
|------------------|-----------------------------------------------------------------------------------------------------------------------|
| Penaeoidea       | The common ancestor of <i>Aristaeomorpha foliacea</i> and <i>Penaeus monodon</i> and all of its descendants           |
| Penaeidae        | The common ancestor of <i>Penaeus monodon</i> and <i>Atypopenaeus formosus</i> and all of its descendants             |
| Penaeni          | The common ancestor of <i>Penaeus monodon</i> and <i>Pelagopenaeus balboae</i> and all of its descendants             |
| Pan-Agripenaeina | All species more closely related to Agripenaeini than to <i>Heteropenaeus longimanus</i>                              |
| Agripenaeina     | The common ancestor of <i>Penaeus monodon</i> and <i>Marsupenaeus japonicus</i> and all of its descendants            |
| Parapenaeni      | The common ancestor of <i>Metapenaeopsis palmensis</i> and <i>Artemesia longinaris</i> and all of its descendants     |
| Trachypenaeni    | The common ancestor of <i>Xiphopenaeus kroyeri</i> and <i>Atypopenaeus formosus</i> and all of its descendants        |
| Pan-Sicyonia     | All species more closely related to crown clade Sicyonia than to <i>Trachypenaeopsis mobilispinis</i>                 |
| Sicyonia         | The common ancestor of <i>Sicyonia lancifer</i> and <i>Sicyonia laevigata</i> and all of its descendants              |
| Phorcysida       | The common ancestor of <i>Aristaeomorpha foliacea</i> and <i>Hymenopenaeus equalis</i> and all of its descendants     |
| Podobranchida    | The common ancestor of <i>Aristaeomorpha foliacea</i> and <i>Bentheogennema intermedia</i> and all of its descendants |
| Aristeidae       | The common ancestor of <i>Aristaeomorpha foliacea</i> and <i>Pseudaristeus kathleenae</i> and all of its descendants  |
| Benthescymidae   | The common ancestor of <i>Benthonectes filipes</i> and <i>Gennadas valens</i> and all of its descendants              |
| Solenoceridae    | The common ancestor of <i>Gordonella paravillosa</i> and <i>Hymenopenaeus equalis</i> and all of its descendants      |
| Sergestoidea     | The common ancestor of <i>Sergia robusta</i> and <i>Acetes americanus carolinae</i> and all of its descendants        |
