# Supplementary material for: The Origin of Large-Bodied Shrimp that Dominate Modern Global Aquaculture
Source: PubMed Central journal article supplement (PMC4945062; doi:10.1371/journal.pone.0158840), 2016-07-14
Supplement: pone.0158840.s008.pdf [file pone.0158840.s008.pdf]

**S4 Table. Global shrimp aquaculture production by species based on Food and Agriculture Organization of the United Nations (FAO) statistics (<http://www.fao.org/fishery/statistics/en>). Italicized values are FAO estimates, and some zero (0) values may correspond to very small contributions, rounded to 0. Species names are as reported by FAO, with those that belong to Agripenaeina indicated in bold.**

nei=not included elsewhere

| Common name                      | Species§                           | Aquaculture production per year in tons* |              |               |               |                | Species contribution (% of year total) |            |            |            |            |
|----------------------------------|------------------------------------|------------------------------------------|--------------|---------------|---------------|----------------|----------------------------------------|------------|------------|------------|------------|
|                                  |                                    | 1970                                     | 1980         | 1990          | 2000          | 2013           | 1970                                   | 1980       | 1990       | 2000       | 2013       |
| Akiami paste shrimp              | <i>Acetes japonicus</i>            | 0                                        | 166          | 1389          | 544           | 0              | 0%                                     | 0%         | 0%         | 0%         | 0%         |
| Atlantic ditch shrimp            | <i>Palaemonetes varians</i>        | 0                                        | 0            | 0             | 0             | 5              | 0%                                     | 0%         | 0%         | 0%         | 0%         |
| <b>Banana prawn</b>              | <b><i>Penaeus merguensis</i></b>   | <b>1623</b>                              | <b>14918</b> | <b>32823</b>  | <b>50393</b>  | <b>19811</b>   | <b>18%</b>                             | <b>21%</b> | <b>5%</b>  | <b>4%</b>  | <b>1%</b>  |
| <b>Blue shrimp</b>               | <b><i>Penaeus stylirostris</i></b> | <b>0</b>                                 | <b>1658</b>  | <b>8825</b>   | <b>1824</b>   | <b>2164</b>    | <b>0%</b>                              | <b>2%</b>  | <b>1%</b>  | <b>0%</b>  | <b>0%</b>  |
| <b>Brown tiger prawn</b>         | <b><i>Penaeus esculentus</i></b>   | <b>0</b>                                 | <b>0</b>     | <b>7</b>      | <b>0</b>      | <b>0</b>       | 0%                                     | 0%         | 0%         | 0%         | 0%         |
| <b>Caramote prawn</b>            | <b><i>Penaeus kerathurus</i></b>   | <b>0</b>                                 | <b>0</b>     | <b>0</b>      | <b>0</b>      | <b>0</b>       | 0%                                     | 0%         | 0%         | 0%         | 0%         |
| Common prawn                     | <i>Palaemon serratus</i>           | 0                                        | 0            | 0             | 0             | 15             | 0%                                     | 0%         | 0%         | 0%         | 0%         |
| Eastern school shrimp            | <i>Metapenaeus macleayi</i>        | 0                                        | 0            | 10            | 0             | 0              | 0%                                     | 0%         | 0%         | 0%         | 0%         |
| <b>Fleshy prawn</b>              | <b><i>Penaeus chinensis</i></b>    | <b>86</b>                                | <b>9820</b>  | <b>185074</b> | <b>193497</b> | <b>41973</b>   | <b>1%</b>                              | <b>14%</b> | <b>27%</b> | <b>17%</b> | <b>1%</b>  |
| <b>Giant tiger prawn</b>         | <b><i>Penaeus monodon</i></b>      | <b>2122</b>                              | <b>16549</b> | <b>289774</b> | <b>630984</b> | <b>803580</b>  | <b>24%</b>                             | <b>23%</b> | <b>43%</b> | <b>55%</b> | <b>21%</b> |
| Greasyback shrimp                | <i>Metapenaeus ensis</i>           | 322                                      | 684          | 677           | 233           | 155            | 4%                                     | 1%         | 0%         | 0%         | 0%         |
| <b>Indian white prawn</b>        | <b><i>Penaeus indicus</i></b>      | <b>10</b>                                | <b>150</b>   | <b>6736</b>   | <b>16444</b>  | <b>23592</b>   | <b>0%</b>                              | <b>0%</b>  | <b>1%</b>  | <b>1%</b>  | <b>1%</b>  |
| <b>Kuruma prawn</b>              | <b><i>Penaeus japonicus</i></b>    | <b>311</b>                               | <b>1572</b>  | <b>9417</b>   | <b>2838</b>   | <b>47652</b>   | <b>3%</b>                              | <b>2%</b>  | <b>1%</b>  | <b>0%</b>  | <b>1%</b>  |
| Metapenaeus shrimps nei          | <i>Metapenaeus spp</i>             | 941                                      | 8502         | 28580         | 20547         | 63485          | 10%                                    | 12%        | 4%         | 2%         | 2%         |
| Natantian decapods nei           | <i>Natantia</i>                    | 72                                       | 124          | 430           | 540           | 0              | 1%                                     | 0%         | 0%         | 0%         | 0%         |
| Palaemonid shrimps nei           | <i>Palaemonidae</i>                | 0                                        | 0            | 160           | 110           | 67             | 0%                                     | 0%         | 0%         | 0%         | 0%         |
| <b>Penaeus shrimps nei</b>       | <b><i>Penaeus spp</i></b>          | <b>3450</b>                              | <b>8930</b>  | <b>21659</b>  | <b>62132</b>  | <b>129918</b>  | <b>38%</b>                             | <b>13%</b> | <b>3%</b>  | <b>5%</b>  | <b>3%</b>  |
| <b>Redtail prawn</b>             | <b><i>Penaeus penicillatus</i></b> | <b>0</b>                                 | <b>0</b>     | <b>1769</b>   | <b>44</b>     | <b>2</b>       | <b>0%</b>                              | <b>0%</b>  | <b>0%</b>  | <b>0%</b>  | <b>0%</b>  |
| <b>Southern white shrimp</b>     | <b><i>Penaeus schmitti</i></b>     | <b>0</b>                                 | <b>0</b>     | <b>1206</b>   | <b>2338</b>   | <b>0</b>       | <b>0%</b>                              | <b>0%</b>  | <b>0%</b>  | <b>0%</b>  | <b>0%</b>  |
| Speckled shrimp                  | <i>Metapenaeus monoceros</i>       | 0                                        | 0            | 0             | 0             | 7533           | 0%                                     | 0%         | 0%         | 0%         | 0%         |
| <b>Whiteleg shrimp</b>           | <b><i>Penaeus vannamei</i></b>     | <b>50</b>                                | <b>8359</b>  | <b>91698</b>  | <b>154515</b> | <b>2690295</b> | <b>1%</b>                              | <b>12%</b> | <b>13%</b> | <b>14%</b> | <b>70%</b> |
| <b>Grand total</b>               |                                    | 8987                                     | 71432        | 680234        | 1136983       | 3830247        | 100%                                   | 100%       | 100%       | 100%       | 100%       |
| <b>Agripenaeina contribution</b> |                                    | 7652                                     | 61956        | 648988        | 1115009       | 3758987        | 85%                                    | 87%        | 95%        | 98%        | 98%        |
