# Supplementary material for: The Origin of Large-Bodied Shrimp that Dominate Modern Global Aquaculture
Source: PubMed Central journal article supplement (PMC4945062; doi:10.1371/journal.pone.0158840), 2016-07-14
Supplement: pone.0158840.s009.pdf [file pone.0158840.s009.pdf]

S5 Table. Taxa sampled in this study and summary of data collected

| Taxonomy*       | Genus                      | Species                 | Molecular (1,480 characters) |                 |                 |           | Phenomic (339 characters)                                             |           |
|-----------------|----------------------------|-------------------------|------------------------------|-----------------|-----------------|-----------|-----------------------------------------------------------------------|-----------|
|                 |                            |                         | H3                           | NAK             | PEPCK           | % missing | Specimens§                                                            | % missing |
| <b>Extant</b>   |                            |                         |                              |                 |                 |           |                                                                       |           |
| Aristeidae      | <i>Aristaeomorpha</i>      | <i>foliacea</i>         | GQ487517.1                   | FJ441125        | FJ441170        | 4.1       | 139702, 139747                                                        | 1.7       |
|                 | <i>Aristaeopsis</i>        | <i>edwardsiana</i>      | JX403895.1                   | FJ441126        | FJ441171        | 0         | 255065                                                                | 0.3       |
|                 | <i>Aristeus</i>            | <i>virilis</i>          | na                           | EU427143        | EU427212        | 25.4      | 288529                                                                | 0.3       |
|                 | <i>Hemipenaeus</i>         | <i>carpenteri</i>       | JX403889.1                   | FJ441140        | FJ441185        | 0         | 1021925, 1021916, 255812                                              | 7.4       |
|                 | <i>Hepomadus</i>           | <i>tener</i>            | <b>KX216642</b>              | <b>KX216650</b> | <b>KX216667</b> | 2.8       | 222645, 236917                                                        | 6.8       |
|                 | <i>Parahepomadus</i>       | <i>vaubani</i>          | na                           | FJ441152        | FJ441197        | 22.2      | 255846                                                                | 6.8       |
|                 | <i>Plesiopenaeus</i>       | <i>armatus</i>          | JX403900.1                   | FJ441160        | FJ441205        | 0         | 188970                                                                | 6.2       |
|                 | <i>Pseudaristeus</i>       | <i>kathleenae</i>       | na                           | <b>KX216651</b> | <b>KX216668</b> | 22.2      | 216716,                                                               | 9.7       |
| Benthescymidae  | <i>Bentheogennema</i>      | <i>intermedia</i>       | JX403892.1                   | na              | <b>KX216669</b> | 40.3      | 167604, 167648                                                        | 19.2      |
|                 | <i>Benthescymus</i>        | <i>investigatoris</i>   | na                           | FJ441131        | FJ441176        | 22.2      | 1192445, 1256413                                                      | 10.6      |
|                 | <i>Benthonectes</i>        | <i>filipes</i>          | na                           | FJ441130        | FJ441175        | 22.3      | 1256414                                                               | 8         |
|                 | <i>Gennadas</i>            | <i>valens</i>           | JX403902.1                   | <b>KX216652</b> | <b>KX216670</b> | 2         | 96007                                                                 | 7.4       |
| Penaeidae       | <i>Artemesia</i>           | <i>longinaris</i>       | <b>KX216643</b>              | <b>KX216662</b> | <b>KX216681</b> | 0.4       | 1256144, 1256146, 255567                                              | 0         |
|                 | <i>Atypopenaeus</i>        | <i>formosus</i>         | na                           | <b>KX216653</b> | <b>KX216671</b> | 33.6      | 102380, 1256227, 102380                                               | 6.8       |
|                 | <i>Atypopenaeus</i>        | <i>stenodactylus</i>    | na                           | <b>KX216654</b> | <b>KX216672</b> | 23.24     | 244069                                                                | 6.2       |
|                 | <i>Farfantepenaeus</i>     | <i>aztecus</i>          | <b>KX216647</b>              | FJ441156        | FJ441201        | 1.5       | 140132                                                                | 0.6       |
|                 | <i>Fenneropenaeus</i>      | <i>merguiensis</i>      | na                           | FJ441159        | FJ441204        | 23.6      | 1151689                                                               | 2.4       |
|                 | <i>Funchalia</i>           | <i>villosa</i>          | JX403893.1                   | <b>KX216655</b> | <b>KX216673</b> | 2.2       | 255580                                                                | 5         |
|                 | <i>Heteropenaeus</i>       | <i>longimanus</i>       | na                           | JF899850.1      | JF899862.1      | 25.13     | 255602                                                                | 11.8      |
|                 | <i>Litopenaeus</i>         | <i>setiferus</i>        | JX403906.1                   | FJ441143        | FJ441188        | 0.1       | 203506                                                                | 0.6       |
|                 | <i>Macropetasma</i>        | <i>africana</i>         | <b>KX216644</b>              | <b>KX216656</b> | <b>KX216674</b> | 1.6       | 252426, 216119                                                        | 6.5       |
|                 | <i>Marsupenaeus</i>        | <i>japonicus</i>        | na                           | FJ441145        | FJ441190        | 25.4      | 216140                                                                | 0.6       |
|                 | <i>Megokris</i>            | <i>pescadorensis</i>    | na                           | FJ441146        | FJ441191        | 22.2      | 254367, 156444                                                        | 7.4       |
|                 | <i>Melicertus</i>          | <i>latisulcatus</i>     | na                           | FJ441147        | FJ441192        | 23.5      | 216150                                                                | 5.9       |
|                 | <i>Metapenaeopsis</i>      | <i>palmensis</i>        | na                           | FJ441153        | FJ441198        | 22.2      | 255629, 171019                                                        | 6.2       |
|                 | <i>Metapenaeus</i>         | <i>ensis</i>            | na                           | FJ441151        | FJ441196        | 22.2      | 286927, 156398                                                        | 5.3       |
|                 | <i>Parapenaeopsis</i>      | <i>cornuta</i>          | na                           | FJ441154        | FJ441199        | 22.2      | 255678                                                                | 5         |
|                 | <i>Parapenaeus</i>         | <i>sextuberculatus</i>  | na                           | FJ441155        | FJ441200        | 22.2      | 216041                                                                | 5         |
|                 | <i>Pelagopenaeus</i>       | <i>balboae</i>          | na                           | FJ441157        | FJ441202        | 22.3      | 216499                                                                | 4.7       |
|                 | <i>Penaeopsis</i>          | <i>eduardoi</i>         | na                           | FJ441158        | FJ441203        | 26.5      | 255511, 255512, 263479                                                | 1.8       |
|                 | <i>Penaeus</i>             | <i>monodon</i>          | na                           | EU427144        | EU427213        | 25.4      | 216152                                                                | 0.9       |
|                 | <i>Rimapenaeus</i>         | <i>pacificus</i>        | na                           | FJ441161        | FJ441206        | 22.2      | 254365, 139217                                                        | 5.6       |
|                 | <i>Trachypenaeopsis</i>    | <i>mobilispinis</i>     | na                           | FJ905029        | FJ905030        | 22.8      | 251899, 254273                                                        | 5.6       |
|                 | <i>Trachysalambria</i>     | <i>curvirostris</i>     | <b>KX216645</b>              | <b>KX216657</b> | <b>KX216675</b> | 2.6       | 285366                                                                | 5.9       |
|                 | <i>Xiphopenaeus</i>        | <i>kroyeri</i>          | <b>KX216646</b>              | FJ441168        | FJ441213        | 0.6       | 254595                                                                | 5         |
| Sicyoniidae     | <i>Sicyonia</i>            | <i>brevirostris</i>     | na                           | <b>KX216658</b> | <b>KX216676</b> | 30.1      | 225683, 254665                                                        | 0.6       |
|                 |                            | <i>laevigata</i>        | JX403907.1                   | <b>KX216659</b> | <b>KX216677</b> | 1.8       | 254777, 190982                                                        | 2.1       |
|                 |                            | <i>lancifer</i>         | na                           | FJ441163        | FJ441208        | 22.2      | 1011766, 28504                                                        | 1.5       |
| Solenoceridae   | <i>Cryptopenaeus</i>       | <i>clevei</i>           | na                           | FJ441132        | FJ441177        | 22.2      | 1102156                                                               | 28.6      |
|                 | <i>Gordonella</i>          | <i>paravillosa</i>      | na                           | FJ441136        | FJ441181        | 23.5      | 266791                                                                | 6.5       |
|                 | <i>Hadropenaeus</i>        | <i>lucasi</i>           | na                           | FJ441137        | FJ441182        | 22.2      | 253756                                                                | 6.2       |
|                 | <i>Haliporoides</i>        | <i>sibogae</i>          | na                           | FJ441138        | FJ441183        | 25.4      | 261469                                                                | 5.3       |
|                 | <i>Haliporus</i>           | <i>taprobanensis</i>    | na                           | FJ441139        | FJ441184        | 22.2      | 253757, 261482                                                        | 5.3       |
|                 | <i>Hymenopenaeus</i>       | <i>debilis</i>          | JX403890.1                   | <b>KX216664</b> | <b>KX216678</b> | 4         | 253767                                                                | 9.1       |
|                 | <i>Hymenopenaeus</i>       | <i>equalis</i>          | na                           | FJ441142        | FJ441187        | 22.2      | 258797                                                                | 6.2       |
|                 | <i>Mesopenaeus</i>         | <i>brucei</i>           | na                           | FJ441148        | FJ441193        | 22.2      | 1102154, 1102155                                                      | 10        |
|                 | <i>Pleoticus</i>           | <i>robustus</i>         | JX403901.1                   | <b>KX216663</b> | <b>KX216682</b> | 0         | 140617                                                                | 2         |
|                 | <i>Solenocera</i>          | <i>melantho</i>         | na                           | EU427147        | EU427216        | 25.4      | 254012, 254014                                                        | 0.9       |
| <b>Fossils</b>  |                            |                         |                              |                 |                 |           |                                                                       |           |
| Aegeridae       | † <i>Acanthochirana</i>    | <i>smithwoodwardii</i>  | na                           | na              | na              | 100       | MSNM i12360, i12241, i12338, i12512, i12394, i12344, i12374           | 80.2      |
|                 | † <i>Aeger</i>             | <i>tipularius</i>       | na                           | na              | na              | 100       | USNM-PAL-358131, CM-29768                                             | 76.7      |
| Penaeidae       | † <i>Antrimpos</i>         | <i>speciosus</i>        | na                           | na              | na              | 100       | CM 33420, 33375, USNM-PAL-475694, 358134                              | 64.9      |
|                 | † <i>Drobna</i>            | <i>deformis</i>         | na                           | na              | na              | 100       | USNM-PAL-358145, 475720, 475697, 358146, CM-29476, 29466, 29467       | 67.5      |
|                 | † <i>Ifasya</i>            | <i>madagascariensis</i> | na                           | na              | na              | 100       | MSNM-i11309, i9311, i9408, i14229, i9383, i9406, i9328, i11243, i9328 | 84        |
| Benthescymidae  | † <i>Paleobenthescymus</i> | <i>libanensis</i>       | na                           | na              | na              | 100       | USNM-PAL-358506                                                       | 70.7      |
| Sergestidae     | † <i>Paleomattea</i>       | <i>deliciosa</i>        | na                           | na              | na              | 100       | AMNH-44985, 44986, 44987                                              | 70.7      |
| <b>Outgroup</b> |                            |                         |                              |                 |                 |           |                                                                       |           |
| Sergestidae     | <i>Deosergestes</i>        | <i>corniculum</i>       | JX403905.1                   | <b>KX216660</b> | <b>KX216679</b> | 2.1       | 258465                                                                | 1.8       |
|                 | <i>Sergia</i>              | <i>robusta</i>          | <b>KX216641</b>              | <b>KX216661</b> | <b>KX216680</b> | 2.4       | 162071, 165879                                                        | 5.9       |
|                 | <i>Sicyonella</i>          | <i>sp.</i>              | <b>KX216648</b>              | <b>KX216665</b> | na              | 40.1      | MNHN-IZ-4990, MNHN-IZ-4046                                            | 9.7       |
|                 | <i>Acetes</i>              | <i>americanus</i>       | <b>KX216649</b>              | <b>KX216666</b> | na              | 38.5      | 258707                                                                | 5.6       |
|                 |                            | <i>carolinae</i>        |                              |                 |                 |           |                                                                       |           |
| Caridea         | <i>Plesionika</i>          | <i>grandis</i>          | JF346329                     | JF346365.1      | JF346401        | 3.1       | 221415                                                                | 6.8       |
|                 | <i>Metalpheus</i>          | <i>rostratipes</i>      | JF346336                     | JF346372        | JF346408        | 2.9       | 256799, 256805                                                        | 11.8      |
|                 | <i>Systellaspis</i>        | <i>pellucida</i>        | JF346319                     | JF346355        | JF346391        | 2.9       | 256513                                                                | 7.4       |
| Euphausiidae    | <i>Euphasia</i>            | <i>superba</i>          | na                           | FJ441133        | FJ441178        | 22.2      | 1256225                                                               | 2.1       |

\* Recognized taxonomic groupings and taxonomic assignments are taken from Perez-Farfante and Kensley (1997) and from DeGrave et al. (2009)

§ Catalogue numbers of specimens used for morphology scoring. All extant species were scored from specimens at the USNM (National Museum of Natural History, Smithsonian Institution) unless otherwise specified. Other collection abbreviations are as follows: MNHN: National Museum of Natural History, Paris; CM: Carnegie Museum of Natural History; MSNM: Museo Civico di Storia Naturale di Milano; AMNH: Americal Museum of Natural History; na, not available. Accession numbers for molecular data are from GenBank, with new data generated in this study shown in bold.
