# Supplementary material for: The Origin of Large-Bodied Shrimp that Dominate Modern Global Aquaculture
Source: PubMed Central journal article supplement (PMC4945062; doi:10.1371/journal.pone.0158840), 2016-07-14
Supplement: pone.0158840.s010.pdf [file pone.0158840.s010.pdf]

**S6 Table. Age information and number of specimens sampled for fossil taxa in this study**

| Phylogenetic position (this paper, parsimony) | Species sampled by this study         | # of specimens examined (museum vouchers)                                           | Number of unambiguous (ambiguous) synapomorphies of smallest clade that includes this fossil | Geology                                                             | Age range (mya) * | Median age (mya) * | Ref.   |
|-----------------------------------------------|---------------------------------------|-------------------------------------------------------------------------------------|----------------------------------------------------------------------------------------------|---------------------------------------------------------------------|-------------------|--------------------|--------|
| Penaeini                                      | † <i>Acanthochirana smitwoodwardi</i> | 7 specimens (MSNM i12360, i12241, i12338, i12512, i12394, i12344, i12374)           | 3 (8)                                                                                        | Hakel, Lebanon, Upper Cretaceous (Cenomanian)                       | 93.9-100.5        | 97.2               | (1)    |
| Parapenaeini                                  | † <i>Aeger tipularius</i>             | 2 specimens (USNM-PAL-358131, CMNH-29768)                                           | 2 (4)                                                                                        | Solnhofen area in Germany. Most conservative age is Early Tithonian | 145.5-150.8       | 148.5              | (2-5)  |
| Agripenaeina                                  | † <i>Antrimpos speciosus</i>          | 4 specimens (CMNH 33420, 33375, USNM-PAL-475694, 358134)                            | 1 (6)                                                                                        | Solnhofen area in Germany. Most conservative age is Early Tithonian | 145.5-150.8       | 148.5              | (2-5)  |
| Trachypenaeini                                | † <i>Drobna deformis</i>              | 7 specimens (USNM-PAL-358145, 475720, 475697, 358146, CMNH-29476, 29466, 29467)     | 6 (38)                                                                                       | Solnhofen area in Germany. Most conservative age is Early Tithonian | 145.5-150.8       | 148.5              | (2-5)  |
| Parapenaeinini                                | † <i>Ifasya madagascariensis</i>      | 9 specimens (MSNM-i11309, i9311, i9408, i14229, i9383, i9406, i9328, i11243, i9328) | 2 (4)                                                                                        | Lower Triassic of Madagascar Griesbachian (Scythian).               | 247-252           | 249.5              | (6-8)  |
| Benthescymidae                                | † <i>Paleobenthescymus libanensis</i> | 1 specimen (USNM-PAL-358506)                                                        | 4 (8)                                                                                        | Sahel Alma, Lebanon. Upper Cretaceous (Santonian)                   | 83.6-86.3         | 84.95              | (1, 9) |
| Sergestoidea                                  | † <i>Paleomattea deliciosa</i>        | 3 specimens (AMNH-44985, 44986, 44987)                                              | 2 (17)                                                                                       | Romualdo Member, Brazil. Lower Cretaceous (Albian)                  | 100.5-113         | 106.75             | (10)   |

\* Age boundaries for each geological range are taken from (11) or are as reported in the references cited for each fossil

- Garassino A (1994) *The macruran decapod crustaceans of the Upper Cretaceous of Lebanon* (Società italiana di scienze naturali, Museo civico di storia naturale di Milano).
- Schmid DU, Leinfelder RR, & Schweigert G (2005) Stratigraphy and palaeoenvironments of the Upper Jurassic of Southern Germany—a review. *Zitteliana*:31-41.
- Schweigert G (2007) Ammonite biostratigraphy as a tool for dating Upper Jurassic lithographic limestones from South Germany—first results and open questions. *Neues Jahrbuch für Geologie und Paläontologie-Abhandlungen* 245(1):117-125.
- Charbonnier S & Garassino A (2012) The marine arthropods from the Solnhofen Lithographic Limestones (Late Jurassic, Germany) in the collections of the Muséum national d'Histoire naturelle, Paris. *Geodiversitas* 34(4):857-871.
- Münster Gv & Graf Z (1839) Decapoda Macroura. Abbildung und Beschreibung der fossilen langschwänzigen Krebse in den Kalkschiefern von Bayern. *Beitr. Petrefactenkde* 2:1-88.
- Van Straelen V (1933) *Antrimpos madagascariensis*, crustacé décapode du Permotrias de Madagascar. *Bull. Mus. Roy. Hist. Nat. Belgique* 9:1-3.
- Garassino A & Teruzzi G (1995) Studies on Permo-Trias of Madagascar, III: The Decapod Crustaceans of the Ambilobe Region (NW Madagascar). *Atti della Società italiana di scienze naturali e del museo civico di storia naturale di Milano* 134(1):85-113.
- Garassino A & Pasini G (2002) Studies on Permo-Trias of Madagascar. 5. *Ambilobeia karojo* n. gen., n. sp. (Crustacea, Decapoda) from the Lower Triassic (Olenekian) of Ambilobe region (NW Madagascar). *Atti della Società italiana di Scienze naturali e del Museo Civico di Storia naturale in Milano* 143:95-104.
- Glaessner M (1945) LXX.—Cretaceous Crustacea from Mount Lebanon, Syria. *Journal of Natural History* 12(94):694-707.
- Maisey J, de Carvalho, M (1995) First Records of Fossil Sergestid Decapods and Fossil Brachyuran Crab Larvae (Arthropoda, Crustacea), with Remarks on Some Supposed Palaemonid Fossils, from the Santana Formation (Aptian-Albian, NE Brazil). *American Museum Novitates* 21:20.
- Cohen K, Finney S, Gibbard P, & Fan J-X (2013) The ICS international chronostratigraphic chart. *Episodes* 36(3):199-204.
