# Supplementary material for: The Origin of Large-Bodied Shrimp that Dominate Modern Global Aquaculture
Source: PLoS One. 2016 Jul 14;11(7):e0158840. doi: 10.1371/journal.pone.0158840 (PMC4945062; doi:10.1371/journal.pone.0158840)
Supplement: S2 Table — (PDF) [file pone.0158840.s006.pdf]

**S2 Table. Synapomorphies of major clades in this study based on shortest parsimony trees**

| Clade            | Unambiguous synapomorphies                                                                                                                                                                                                                                                                                                                                                                                                                                                                                                                                                                                                                                                                                                              | MorphoBank character numbers                                                          |
|------------------|-----------------------------------------------------------------------------------------------------------------------------------------------------------------------------------------------------------------------------------------------------------------------------------------------------------------------------------------------------------------------------------------------------------------------------------------------------------------------------------------------------------------------------------------------------------------------------------------------------------------------------------------------------------------------------------------------------------------------------------------|---------------------------------------------------------------------------------------|
| Penaeoidea       | dorsal rostral teeth present, post-rostral carina long, hepatic sulcus present, orbito-antennal sulcus present, antennal spine present, arthrobranchia in maxilliped 1 present, anterior arthrobranchia in maxilliped 2 present, maxilliped 3 pleurobranchia present, exopod on pereopod 4 present, exopod on pereopod 5 present, disto-lateral spine on outer margin of first antennular peduncle present, dorsoabdominal carinae on somites 4, 5, and 6 (3 characters), dorsoposterior spine on abdominal somite 6, longitudinal carinae on endopod of uropod, telson with lateral movable spines, more than 4 pairs of dorsolateral movable spines in telson (if present), sperm with acrosome (data missing in all sampled Caridea) | 3, 19, 26, 49, 58, 84, 92, 103, 188, 203, 227, 237, 238, 239, 246, 305, 311, 314, 324 |
| Penaeidae        | last dorsal tooth (epigastric) distinctively separated from other dorsal teeth (applicable only if more than 1 tooth is present behind the rostrum), adrostral carina present, short cervical sulcus, distal article of mandibular palp larger than proximal article, spinules on palp of maxilla 1, epipod of second maxilliped bifurcated, pereopod 1 with basal and ischial spines (2 characters), epipod of pereopod 1 bifurcated, epipod of pereopod 2 bifurcated, pereopod 3 longer than pereopod 2 by at least 30%, antennular prosartema present (conspicuously), ocular scale present, trumpet shaped appendix masculina                                                                                                       | 9, 14, 39, 71, 74, 89, 111, 112, 129, 153, 213, 219, 288, 297                         |
| Penaeini         | multiarticulated palp of maxilla 1, bifurcate epipod on pereopod 3                                                                                                                                                                                                                                                                                                                                                                                                                                                                                                                                                                                                                                                                      | 73, 174                                                                               |
| Pan-Agripenaeina | 4 or more post-rostral teeth, branchiocardiac carina absent, cicatrix on somite 6 present                                                                                                                                                                                                                                                                                                                                                                                                                                                                                                                                                                                                                                               | 8, 56, 261                                                                            |
| Agripenaeina     | large body size                                                                                                                                                                                                                                                                                                                                                                                                                                                                                                                                                                                                                                                                                                                         | 316                                                                                   |
| Parapenaeini     | pterygostomial spine present, dorsoposterior spine on abdominal somites 4 and 5 (2 characters), pleurae of somites 1 and 2 lacking notches at hinge site (2 characters), fixed spines on telson present                                                                                                                                                                                                                                                                                                                                                                                                                                                                                                                                 | 62, 244, 245, 271, 273, 309                                                           |
| Trachypenaeini   | post-ocular sulcus present, pleurobranchia on pereopod 4 segment lacking, pereopod 5 longer than pereopod 4 (by more than 30%)                                                                                                                                                                                                                                                                                                                                                                                                                                                                                                                                                                                                          | 55, 193, 218                                                                          |
| Pan-Sicyonia     | roughly square carapace, pereopod 3 longer than pereopod 4 (by more than 30%), spines on pleural margins of at least somites 2, 4, and 5 (3 characters), narrow dorsal cuticle on abdominal somite 1                                                                                                                                                                                                                                                                                                                                                                                                                                                                                                                                    | 66, 216, 249, 251, 252, 279                                                           |
| Sicyonia         | apical teeth present, anterodorsal projection on abdominal somite 1, deep traverse sulci on abdominal segments, anterior hinges (between somites 1-2 and 2-3) completely inconspicuous (hidden)                                                                                                                                                                                                                                                                                                                                                                                                                                                                                                                                         | 2, 257, 268, 269                                                                      |
| Phorcysida       | Branchiocardiac sulcus present, exopods on all pereopods small (5 characters), ventral antennular flagellum longer than carapace, dorsoposterior spine on abdominal somite 5 present, long pleopods (2.5 times the protopod or longer), ocular tubercle present, male appendix interna present                                                                                                                                                                                                                                                                                                                                                                                                                                          | 57, 127, 151, 172, 189, 204, 222, 245, 283, 287, 294                                  |
| Podobranchida    | branchiostegal and hepatic carinae fused, continuously rounded orbital margin, palp of maxilla 2 lacking spinules, arthrobranchia on maxilliped 1 well developed, anterior arthrobranchia on second maxilliped small, pleurobranchia on maxilliped 3 small, podobranchia on maxilliped 3 present, pleurobranchia on pereopod 1 small, podobranchiae on pereopods 1-3 (3 characters), pereopod 4 is longer than pereopod 3 (by at least 30%), anterior abdominal hinges (between somites 1-2 and 2-3) very conspicuous, raised double notches on pleurae of somites 1 and 2 involved in abdominal hinges (2 characters)                                                                                                                  | 35, 53, 77, 85, 93, 103, 109, 132, 137, 161, 182, 216, 269, 272, 274                  |
| Aristeidae       | adrostral carina present, dactyl of maxilliped 3 with strong proximal depression, pleurobranchiae on pereopods 2-4 small (3 characters), cicatrix on abdominal somite 6, large body size, abyssopelagic maximal depth                                                                                                                                                                                                                                                                                                                                                                                                                                                                                                                   | 14, 110, 156, 177, 194, 261, 316, 320                                                 |
| Benthescymidae   | antennal spine absent, third article of antennular peduncle long (as long or longer than second article), very small cornea of the eye                                                                                                                                                                                                                                                                                                                                                                                                                                                                                                                                                                                                  | 58, 232, 291                                                                          |
| Solenoceridae    | post-antennal spine present, exopod of maxilliped 3 short, abdominal somite 6 not the longest somite, distolateral projection (spur) on male second pleopod, telson with fixed spines                                                                                                                                                                                                                                                                                                                                                                                                                                                                                                                                                   | 60, 100, 247, 298, 309                                                                |
| Sergestoidea     | rostrum not reaching cornea anteriorly, posterior submarginal carina absent, maxilliped 2 exopod absent, maxilliped 3 exopod absent, pleurobranchia absent in all pereopods (5 characters)                                                                                                                                                                                                                                                                                                                                                                                                                                                                                                                                              | 1, 65, 86, 99, 131, 155, 176, 193, 208                                                |
